# Supplementary material for: Novel cyano-bridged mixed-valent copper complexes formed by completely in situ synthetic method via the cleavage of C–C bond in acetonitrile
Source: Royal Society of Chemistry journal article supplement (doi:10.1039/c0dt00345j), 2010-01-01
Supplement: c0dt00345j.pdf [file c0dt00345j.pdf]

## Novel cyano-bridged mixed-valent copper complexes by the whole in situ synthetic method via the cleavage of C–C bond in acetonitrile

Feng Xu, Wei Huang, and Xiao-Zeng You

### Electronic Supporting Information

**Table ESII.** Intermolecular hydrogen bonding interactions (Å, °) in complexes **1-7**.

| D–H...A       | D–H  | H–A  | D...A     | ∠DHA  | Sym. trans            |
|---------------|------|------|-----------|-------|-----------------------|
| <b>1</b>      |      |      |           |       |                       |
| C4–H4...O5    | 0.93 | 2.41 | 3.313(8)  | 164.0 | -1/2+x, 1/2-y, -1/2+z |
| C8–H8...O10   | 0.93 | 2.42 | 3.155(13) | 136.0 | -x, 1-y, -z           |
| C28–H28...O4  | 0.93 | 2.51 | 3.361(10) | 152.0 | 1/2+x, 1/2-y, 1/2+z   |
| C33–H33...O7  | 0.93 | 2.54 | 3.263(9)  | 136.0 | x, -y, -1/2+z         |
| C41–H41...O1  | 0.93 | 2.56 | 3.289(8)  | 135.0 | x, -y, 1/2+z          |
| C45–H45...O12 | 0.93 | 2.49 | 3.112(14) | 124.0 | x, -y, -1/2+z         |
| C50–H50...O8  | 0.93 | 2.39 | 3.171(9)  | 141.0 | -x, y, 1/2-z          |
| <b>2</b>      |      |      |           |       |                       |
| C35–H35...O11 | 0.93 | 2.60 | 3.409(13) | 146.0 | -x, 2-y, 2-z          |
| C40–H40...O11 | 0.93 | 2.48 | 3.299(14) | 147.0 | 1-x, 2-y, 2-z         |
| C49–H49...O10 | 0.93 | 2.42 | 3.308(15) | 159.0 | 1-x, 1-y, 2-z         |
| C50–H50...O12 | 0.93 | 2.59 | 3.336(14) | 138.0 | 1-x, 1-y, 2-z         |
| C52–H52...O9  | 0.93 | 2.51 | 3.242(13) | 136.0 | 1+x, y, z             |
| <b>3</b>      |      |      |           |       |                       |
| C2–H2...F10   | 0.93 | 2.31 | 3.183(11) | 156.0 | 1/2-x, 1/2-y, -z      |
| C3–H3...F11   | 0.93 | 2.54 | 3.248(11) | 133.0 | 1/2-x, 1/2-y, -z      |
| C7–H7...F1    | 0.93 | 2.38 | 3.285(7)  | 165.0 | -x, 1-y, -z           |
| C20–H20...F6  | 0.93 | 2.52 | 3.269(7)  | 138.0 | -1/2+x, 1/2-y, -1/2+z |
| C35–H35...F2  | 0.93 | 2.25 | 3.104(9)  | 152.0 | -1/2+x, -1/2+y, z     |
| C43–H43...F4  | 0.93 | 2.50 | 3.216(8)  | 134.0 | 1/2-x, 3/2-y, -z      |
| C45–H45...F12 | 0.93 | 2.50 | 3.209(14) | 133.0 | 1-x, y, 1/2-z         |
| <b>4</b>      |      |      |           |       |                       |
| O13–H13A...O6 | 0.95 | 2.58 | 3.138(15) | 118.0 | 1+x, y, z             |
| O13–H13A...O7 | 0.95 | 2.42 | 3.190(9)  | 139.0 | 1+x, y, z             |
| C4–H4...O12   | 0.93 | 2.44 | 3.345(7)  | 163.0 | 1-x, 1-y, 1-z         |
| C8–H8...O9    | 0.93 | 2.40 | 3.301(9)  | 163.0 | x, -1+y, z            |
| C12–H12...O4  | 0.93 | 2.57 | 3.263(12) | 132.0 | 1+x, y, z             |

|               |      |      |           |       |                     |
|---------------|------|------|-----------|-------|---------------------|
| C17–H17...O8  | 0.93 | 2.50 | 3.431(9)  | 174.0 | 1-x, 1-y, -z        |
| C18–H18...O13 | 0.93 | 2.55 | 3.317(10) | 140.0 | 1-x, 1-y, -z        |
| C24–H24...O6  | 0.93 | 2.57 | 3.254(10) | 144.0 | -x, 1-y, -z         |
| C28–H28...O13 | 0.93 | 2.45 | 3.347(11) | 161.0 | 1-x, 1-y, 1-z       |
| C32–H32...O7  | 0.93 | 2.44 | 3.191(8)  | 138.0 | x, 1+y, z           |
| C33–H33...O4  | 0.93 | 2.56 | 3.319(11) | 139.0 | x, 1+y, z           |
| C34–H34...O3  | 0.93 | 2.49 | 3.288(11) | 144.0 | x, 1+y, z           |
| <b>5</b>      |      |      |           |       |                     |
| C3–H3...O3    | 0.93 | 2.55 | 3.212(11) | 128.0 | 2-x, 1-y, 1-z       |
| C7–H7...O2    | 0.93 | 2.55 | 3.261(10) | 133.0 | 2-x, -1/2+y, 1/2-z  |
| C20–H20...O4  | 0.93 | 2.58 | 3.220(17) | 127.0 | x, 3/2-y, -1/2+z    |
| <b>6</b>      |      |      |           |       |                     |
| C18–H18A...O1 | 0.93 | 2.59 | 3.468(9)  | 157.0 | 2-x, 2-y, 2-z       |
| C22–H22A...O9 | 0.93 | 2.44 | 3.176(10) | 136.0 | 1+x, y, z           |
| C52–H52A...O9 | 0.93 | 2.59 | 3.248(12) | 128.0 | 1/2+x, 3/2-y, 1/2+z |
| <b>7</b>      |      |      |           |       |                     |
| C5–H5...O2    | 0.93 | 2.47 | 3.38(2)   | 166.0 | 1-x, -y, 1-z        |
| C10–H10...O4' | 0.93 | 2.55 | 3.24(2)   | 132.0 | 1-x, 1-y, 1-z       |
| C14–H14...O3  | 0.93 | 2.52 | 3.35(2)   | 149.0 | -1+x, y, z          |
| C35–H35...O2  | 0.93 | 2.49 | 3.31(3)   | 148.0 | -1+x, y, z          |

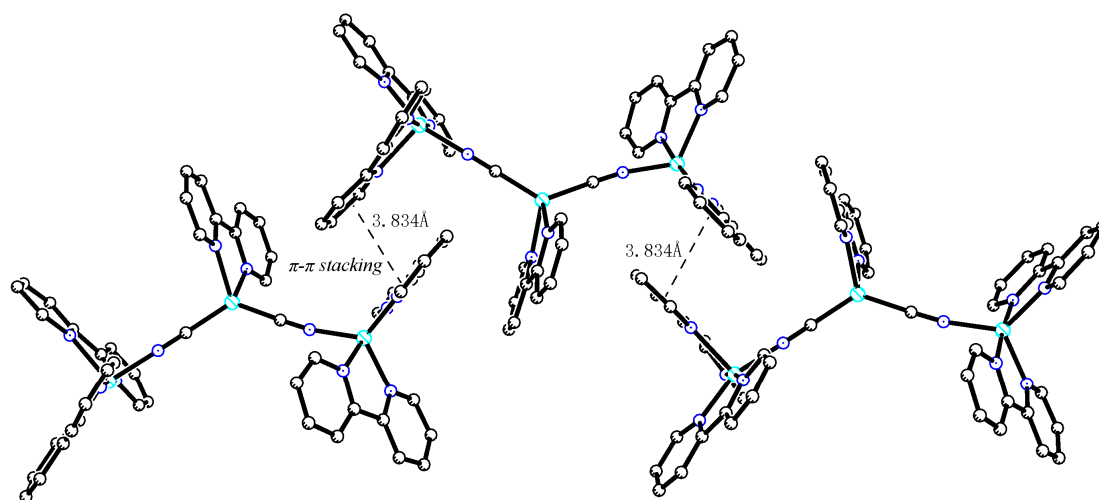

**Fig. ES11.** View of the  $\pi$ - $\pi$  stacking interactions in the crystal packing of **1** with labeling of the centroid-to-centroid distance. Hydrogen atoms and percholate anions are omitted for clarity.

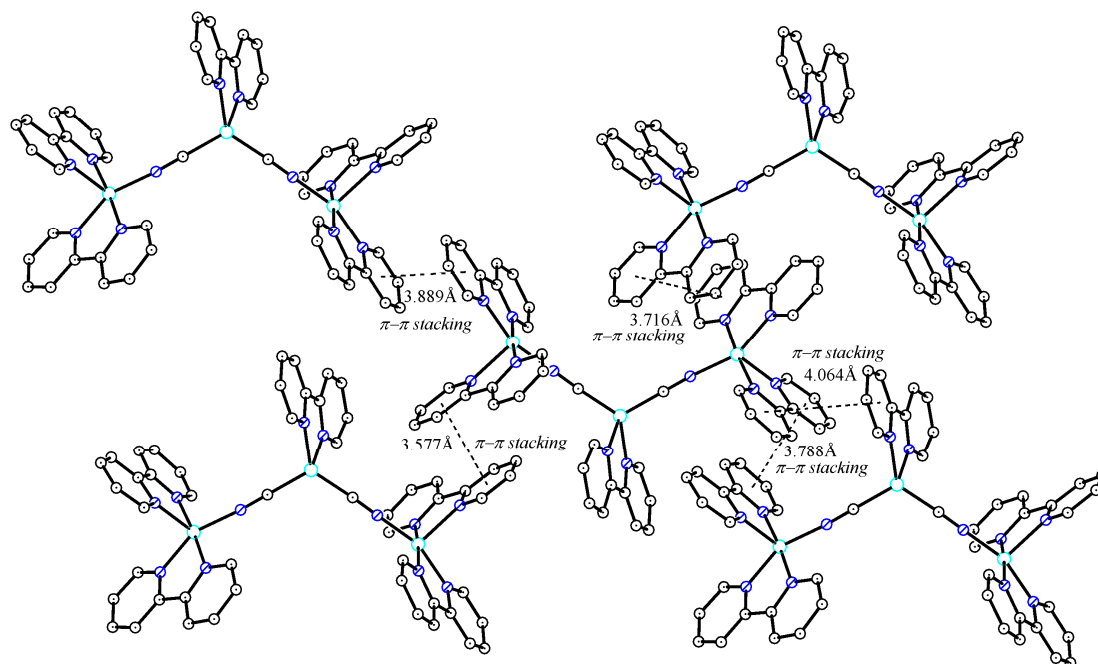

**Fig. ESI2.** View of the  $\pi$ - $\pi$  stacking interactions in the crystal packing of **2** with labeling of the centroid-to-centroid distance. Hydrogen atoms and percholate anions are omitted for clarity.

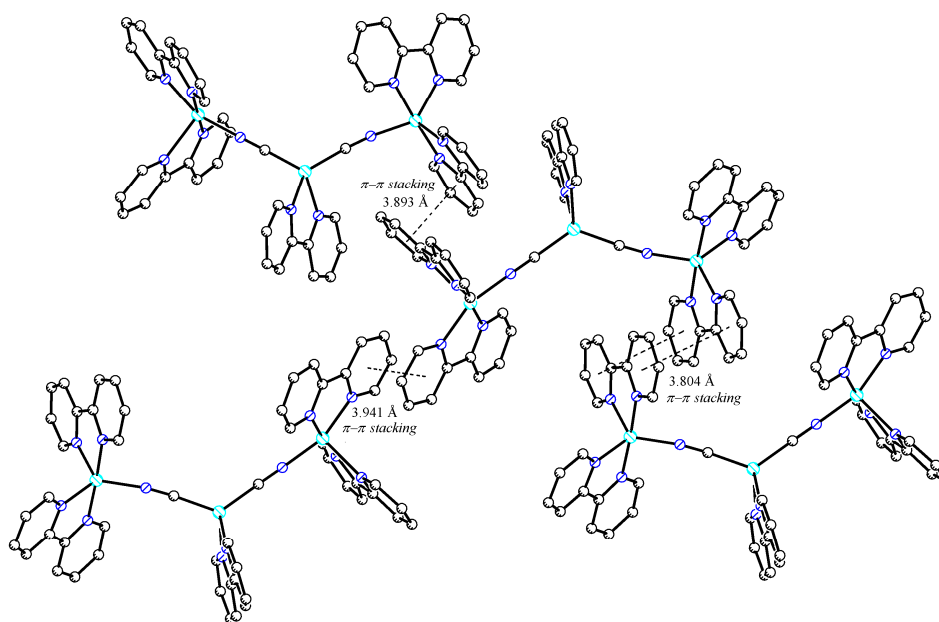

**Fig. ESI3.** View of the  $\pi$ - $\pi$  stacking interactions in the crystal packing of **3** with labeling of the centroid-to-centroid distance. Hydrogen atoms and tetrafluoroborate anions are omitted for clarity.

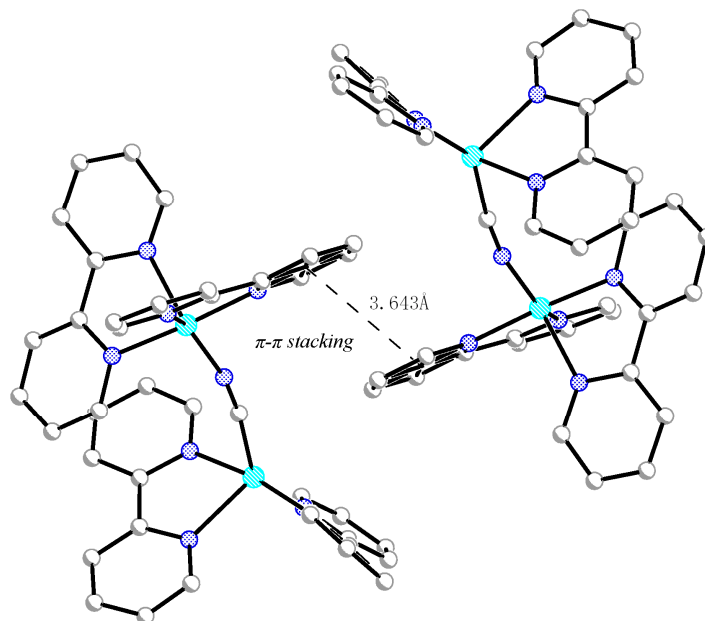

**Fig. ESI4.** View of the  $\pi$ - $\pi$  stacking interactions in the crystal packing of **4** with labeling of the centroid-to-centroid distance. Hydrogen atoms, solvent molecules and percholate anions are omitted for clarity.

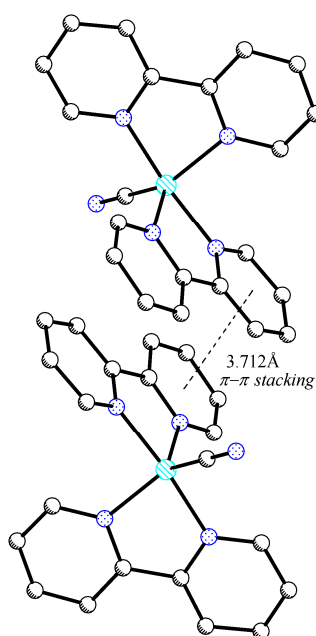

**Fig. ESI5.** View of the  $\pi$ - $\pi$  stacking interactions in the crystal packing of **5** with labeling of the centroid-to-centroid distance. Hydrogen atoms, solvent molecules and percholate anions are omitted for clarity.

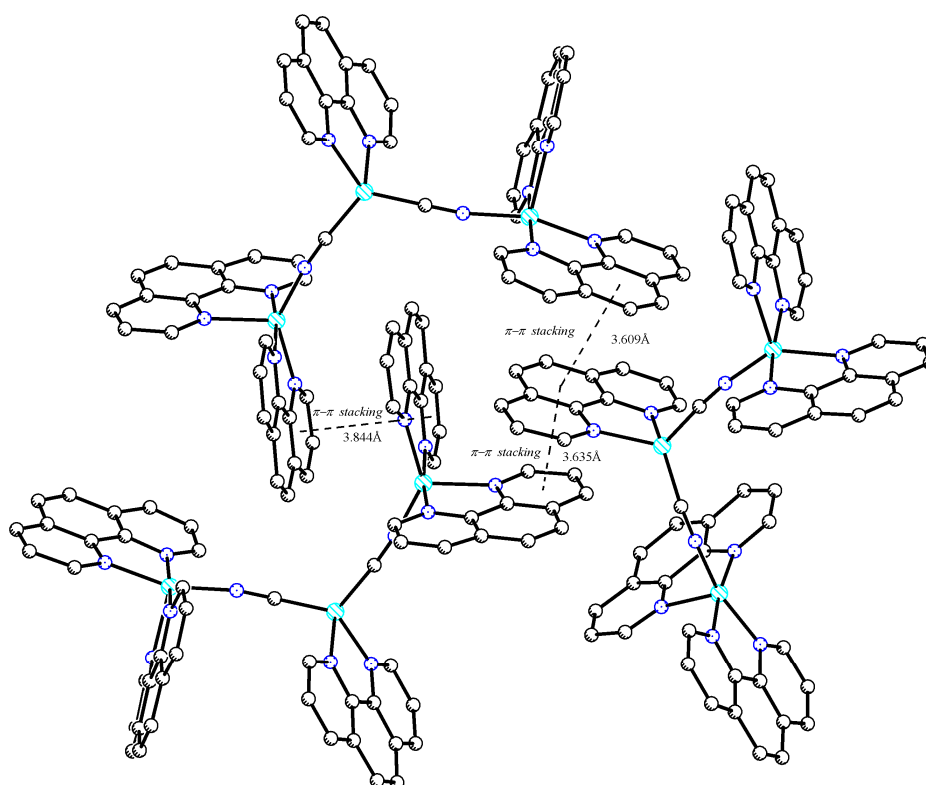

**Fig. ESI6.** View of the  $\pi$ - $\pi$  stacking interactions in the crystal packing of **6** with labeling of the centroid-to-centroid distance. Hydrogen atoms, solvent molecules and percholate anions are omitted for clarity.

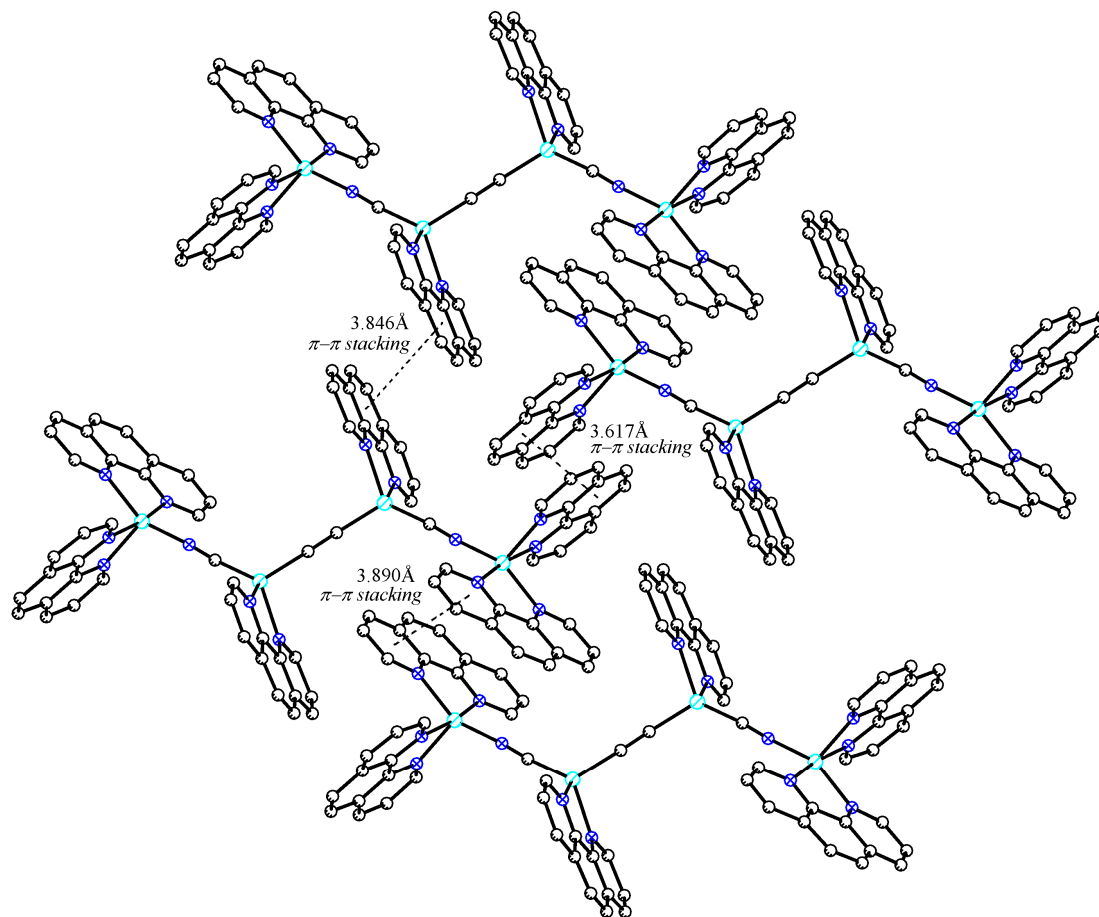

**Fig. ESI7.** View of the  $\pi$ - $\pi$  stacking interactions in the crystal packing of **7** with labeling of the centroid-to-centroid distance. Hydrogen atoms, solvent molecules and percholate anions are omitted for clarity.
